# Supplementary material for: Sticks and Stones, a conserved cell surface ligand for the Type IIa RPTP Lar, regulates neural circuit wiring in Drosophila
Source: eLife. 2022 Mar 31;11:e71469. doi: 10.7554/eLife.71469 (PMC9000958; doi:10.7554/eLife.71469)
Supplement: Figure 4—figure supplement 1—source data 1. — Number of animals with normal and fused medial lobes. Number of normal and missing dorsal lobes. [file elife-71469-fig4-figsupp1-data1.xlsx]

## Sheet: Figure 4-Figure Supplement1-J-K
	Figure 4-figure supplement 1		C155-GAL4/+ (n=18)	C155-GAL4>UAS-Sns RNAi (KK) (n=17)	C155-GAL4>UAS-Sns RNAi (GD) (n=7)	C155-GAL4>UAS-Lar RNAi (HMS02186) (n=17)	C155-GAL4>UAS-Lar RNAi (HMS00822) (n=11)
	J	Medial lobes normal	15	7	4	0	5
	J'	Medial lobes fused	3	10	3	17	6
	Figure 4-figure supplement 1		C155-GAL4/+ (n=18)	C155-GAL4/+; UAS-Sns RNAi (KK) (n=34)	C155-GAL4/+; UAS-Sns RNAi (GD) (n=14)	C155-GAL4/+; UAS-Lar RNAi (HMS02186) (n=34)	C155-GAL4/+; UAS-Lar RNAi (HMS00822) (n=22)
	K	Dorsal lobes normal	17	30	11	13	16
	K'	Dorsal lobes missing	1	4	3	21	6
