# Supplementary material for: Sticks and Stones, a conserved cell surface ligand for the Type IIa RPTP Lar, regulates neural circuit wiring in Drosophila
Source: eLife. 2022 Mar 31;11:e71469. doi: 10.7554/eLife.71469 (PMC9000958; doi:10.7554/eLife.71469)
Supplement: Figure 4—figure supplement 2—source data 1. — Number of animals with normal and fused medial lobes. [file elife-71469-fig4-figsupp2-data1.xlsx]

## Sheet: Figure 4-Figure Supplement2-G-H
	Figure 4-figure supplement 2		SnsDf / + (n=17)	Lar13.2/ SnsDf (n=17)	OK107-GAL4/+ (n=10)	OK107-GAL4>UAS-Lar RNAi (n=22)	OK107-GAL4>UAS-Sns RNAi (n=11)	Lar13.2/+; OK107-GAL4 >UAS-Sns RNAi (n=8)	C155-GAL4>UAS-Sns RNAi (n=17)	C155-GAL4>UAS-Kirre RNAi (n=12)
	G	Medial lobes normal	16	10	10	12	11	7	7	12
	H	Medial lobes fused	1	7	0	10	0	1	10	0
