# Supplementary material for: Sticks and Stones, a conserved cell surface ligand for the Type IIa RPTP Lar, regulates neural circuit wiring in Drosophila
Source: eLife. 2022 Mar 31;11:e71469. doi: 10.7554/eLife.71469 (PMC9000958; doi:10.7554/eLife.71469)
Supplement: Figure 4—source data 1. — Number of animals with normal and fused medial lobes. Number of normal and missing dorsal lobes. [file elife-71469-fig4-data1.xlsx]

## Sheet: Figure 4M-N
	Figure 4		lar13.2/+ (n=14)	lar451/+ (n=12)	snsxb3/+ (n=23)	lar13.2/snsxb3 (n=16)	lar451/snsxb3 (n=17)	lar13.2/lar451 (n=16)
	M	Medial lobes normal	14	11	21	10	10	5
	M'	Medial lobes fused	0	1	2	6	7	11
	Figure 4		lar13.2/+ (n=28)	lar451/+ (n=24)	snsxb3/+ (n=48)	lar13.2/snsxb3 (n=32)	lar451/snsxb3 (n=34)	lar13.2/lar451 (n=32)
	N	Dorsal lobes normal	28	24	48	21	5	5
	N'	Dorsal lobes missing	0	0	0	11	29	27
