# Supplementary material for: Sticks and Stones, a conserved cell surface ligand for the Type IIa RPTP Lar, regulates neural circuit wiring in Drosophila
Source: eLife. 2022 Mar 31;11:e71469. doi: 10.7554/eLife.71469 (PMC9000958; doi:10.7554/eLife.71469)
Supplement: Figure 6—figure supplement 1—source data 1. — Number of animals with normal and fused β′ lobes. [file elife-71469-fig6-figsupp1-data1.xlsx]

## Sheet: Figure 6-figure supplement 1E-F
	Figure 6-figure supplement 1		OK107-GAL4/+ (n=10)	OK107-GAL4>UAS-Lar RNAi (n=15)	OK107-GAL4>UAS-Sns RNAi (n=14)	Lar13.2/+; OK107-GAL4 >UAS-Sns RNAi (n=12)	C155-GAL4>UAS-Sns RNAi (n=17)	C155-GAL4>UAS-Kirre RNAi (n=11)
	E	β' lobes normal	10	4	14	12	8	11
	F	β' lobes fused	0	11	0	0	9	0
