# Supplementary material for: Sticks and Stones, a conserved cell surface ligand for the Type IIa RPTP Lar, regulates neural circuit wiring in Drosophila
Source: eLife. 2022 Mar 31;11:e71469. doi: 10.7554/eLife.71469 (PMC9000958; doi:10.7554/eLife.71469)
Supplement: Figure 6—source data 1. — Number of animals with normal and fused β and β′ lobes. Number of normal and missing α and α′ lobes. [file elife-71469-fig6-data1.xlsx]

## Sheet: Figure 6G-P
	Figure 6		lar13.2/+ (n=20)	lar451/+ (n=21)	snsxb3/+ (n=19)	lar13.2/snsxb3 (n=33)	lar451/snsxb3 (n=23)	lar13.2/lar451 (n=19)
	G	β lobes normal	20	21	19	15	4	2
	G'	β lobes fused	0	0	0	18	19	17
	Figure 6		lar13.2/+ (n=40)	lar451/+ (n=42)	snsxb3/+ (n=38)	lar13.2/snsxb3 (n=58)	lar451/snsxb3 (n=46)	lar13.2/lar451 (n=38)
	H	α lobes normal	40	42	38	15	10	3
	H'	α lobes missing	0	0	0	43	36	35
	Figure 6		lar13.2/+ (n=16)	lar451/+ (n=15)	snsxb3/+ (n=14)	lar13.2/snsxb3 (n=22)	lar451/snsxb3 (n=19)	lar13.2/lar451 (n=15)
	O	β' lobes normal	16	15	14	5	0	0
	O'	β' lobes fused	0	0	0	17	19	15
	Figure 6		lar13.2/+ (n=32)	lar451/+ (n=30)	snsxb3/+ (n=28)	lar13.2/snsxb3 (n=46)	lar451/snsxb3 (n=38)	lar13.2/lar451 (n=30)
	P	α' lobes normal	32	30	28	11	12	3
	P'	α' lobes missing	0	0	0	35	26	27
