# Supplementary figures and images for: Sticks and Stones, a conserved cell surface ligand for the Type IIa RPTP Lar, regulates neural circuit wiring in Drosophila
Source: eLife journal article supplement (doi:10.7554/elife.71469), 2022-03-31

**Figure 3-figure supplement 2**

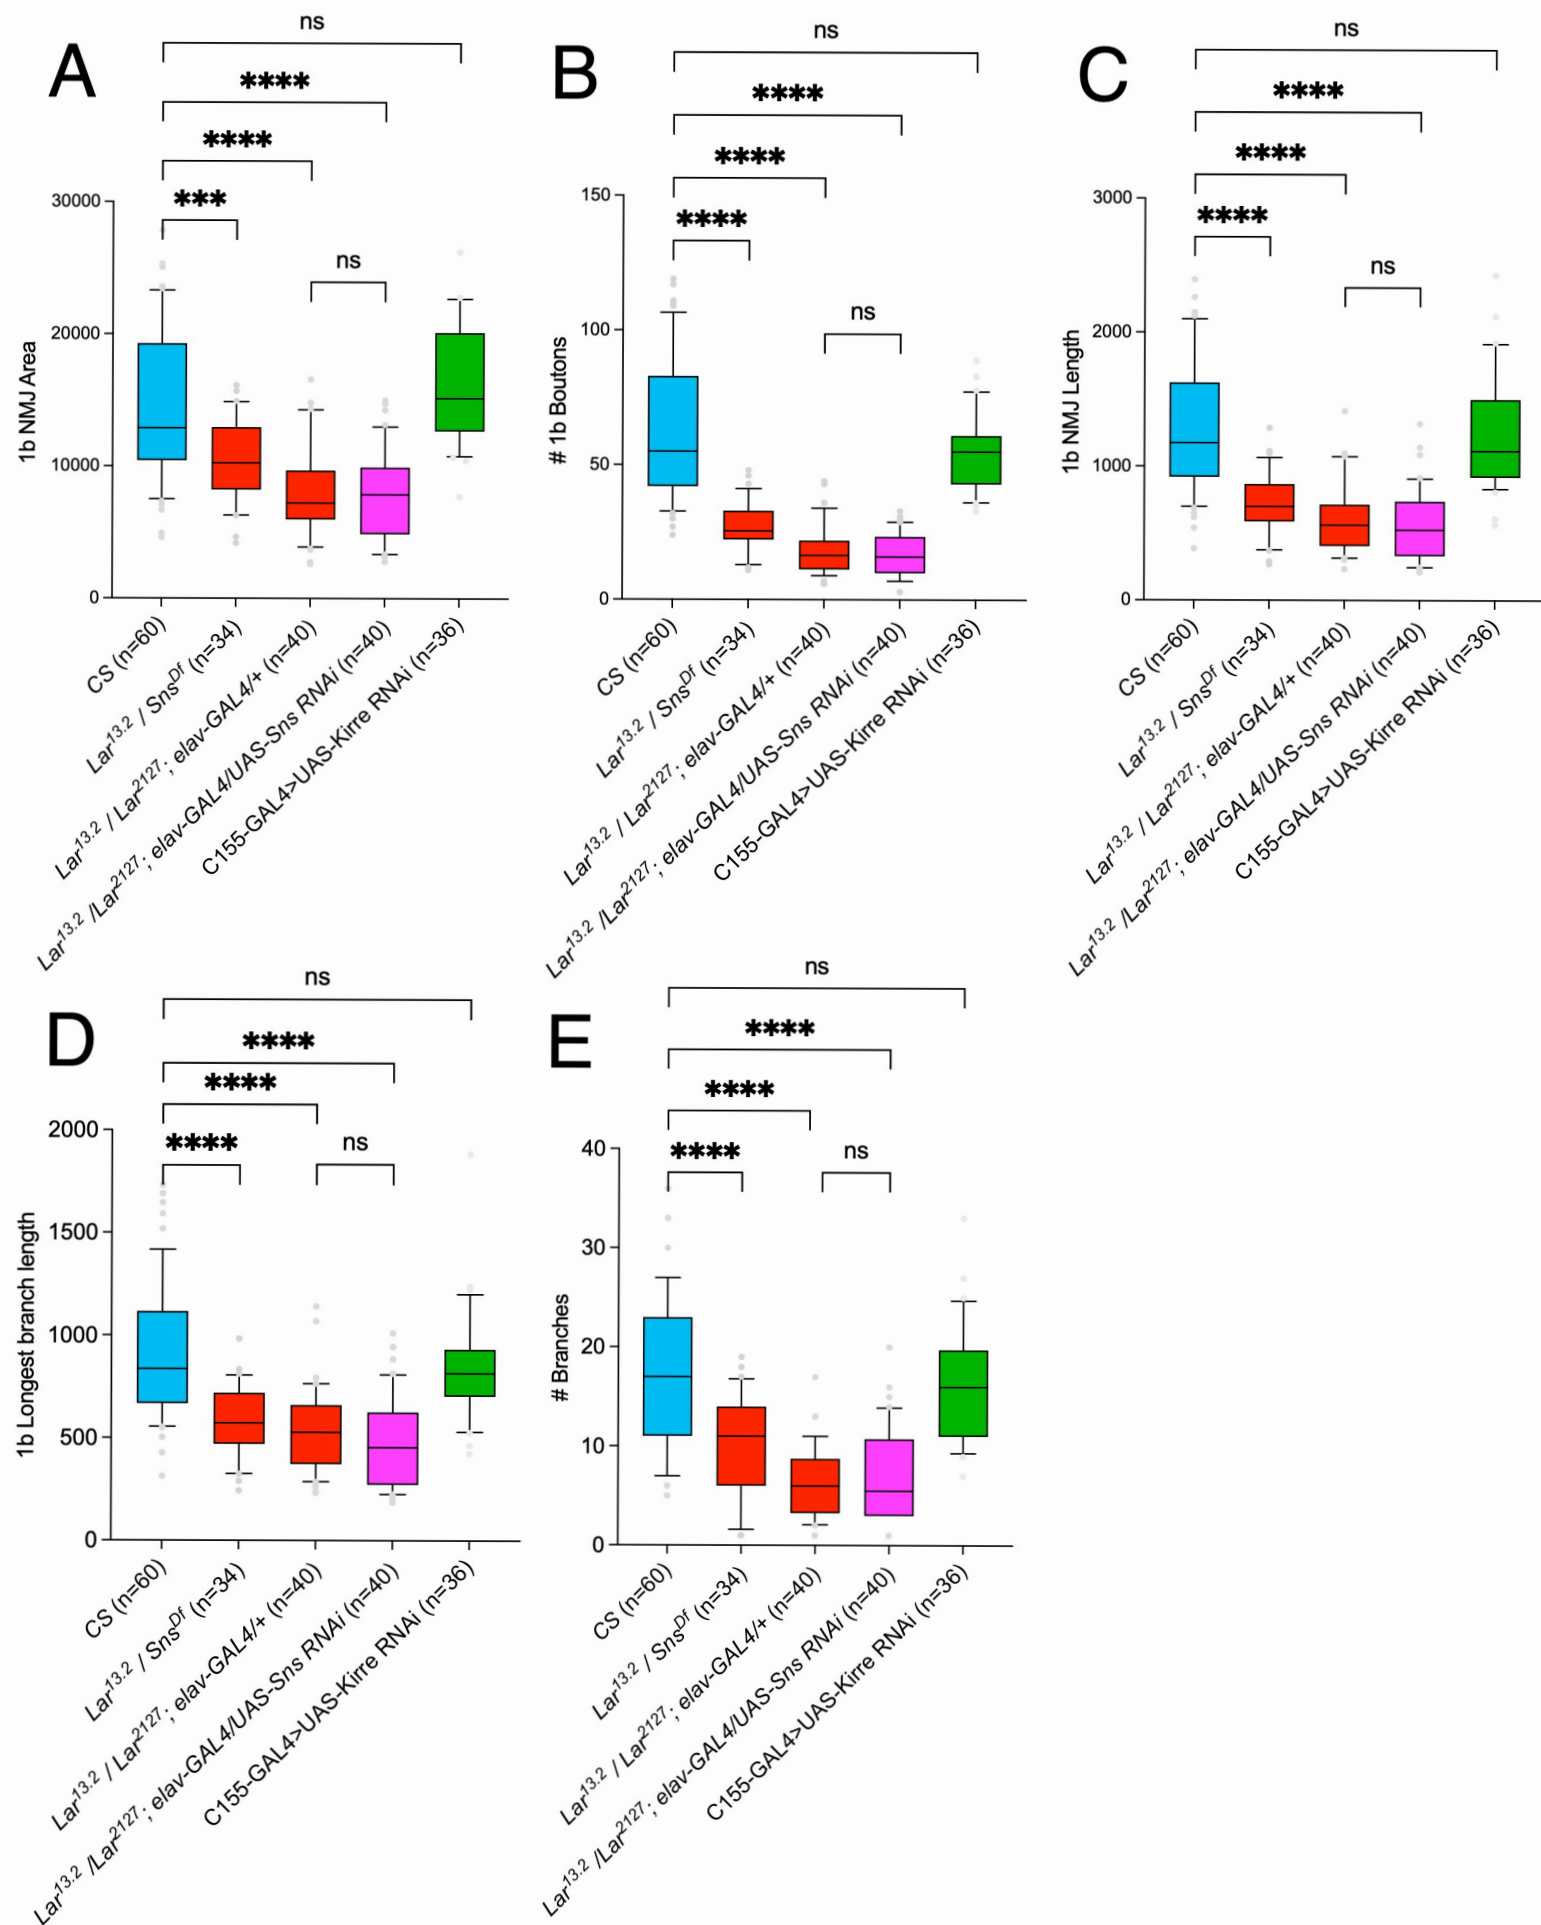

Supplement: supp [file elife-71469-supp-v1.zip]

Figure 1-figure supplement 1

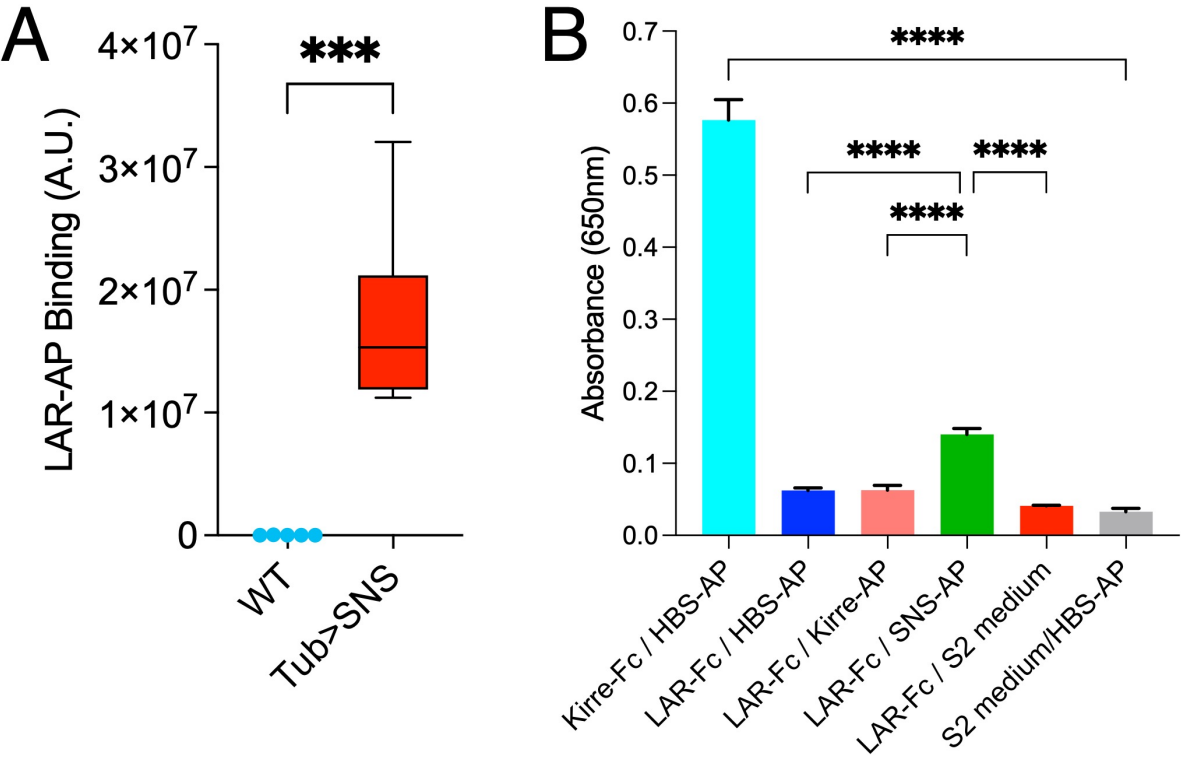

Supplement: supp [file elife-71469-supp-v1.zip]

Figure 7-figure supplement 1

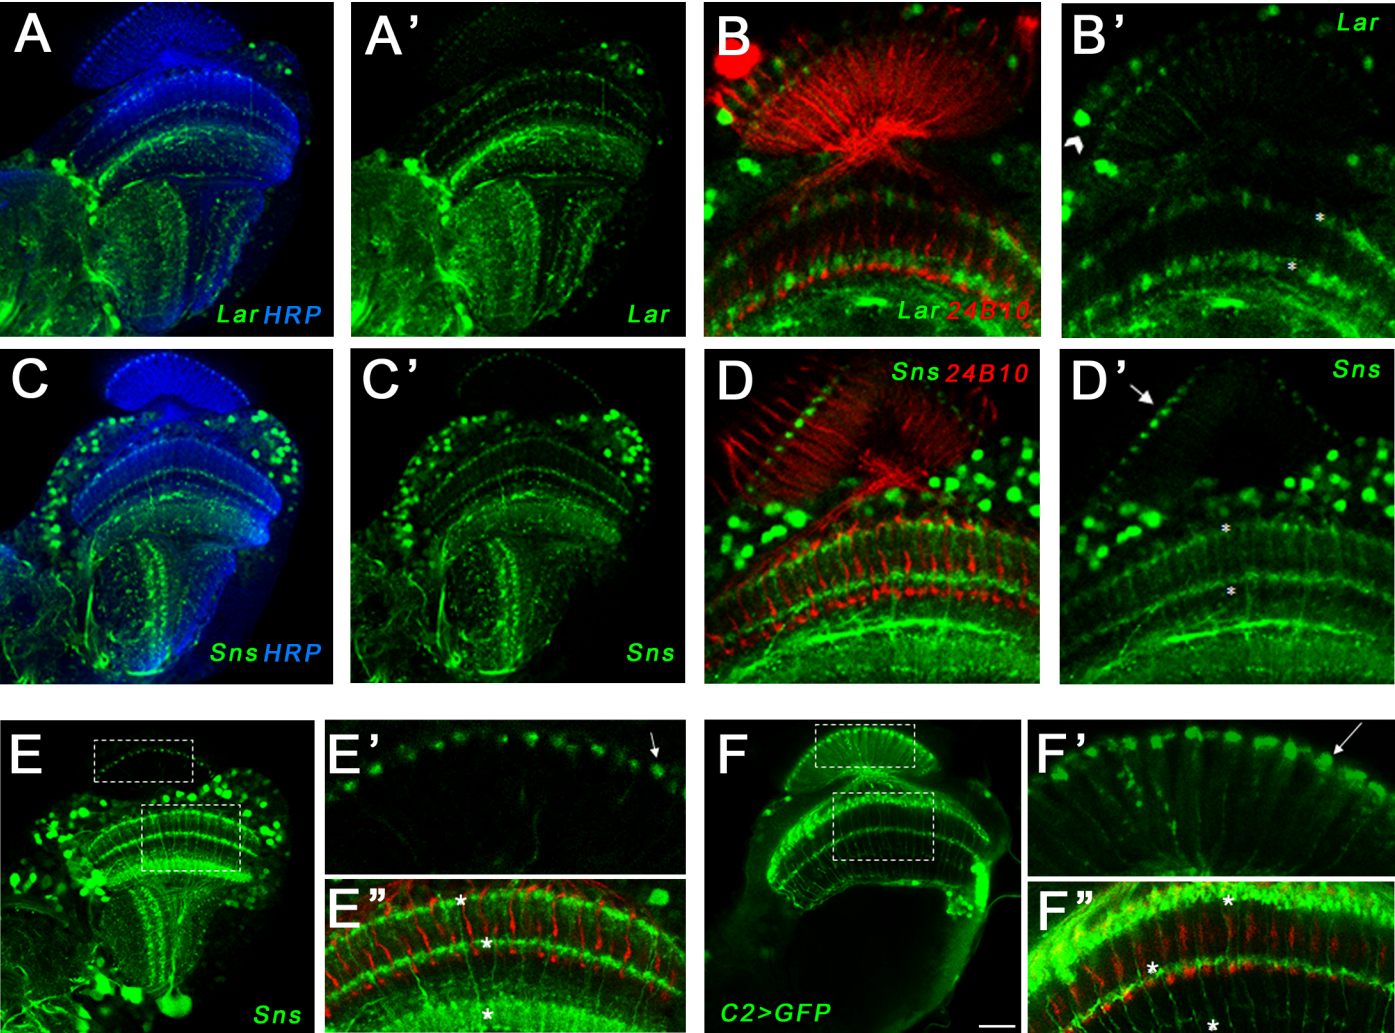

Supplement: supp [file elife-71469-supp-v1.zip]

Figure 5-figure supplement 1

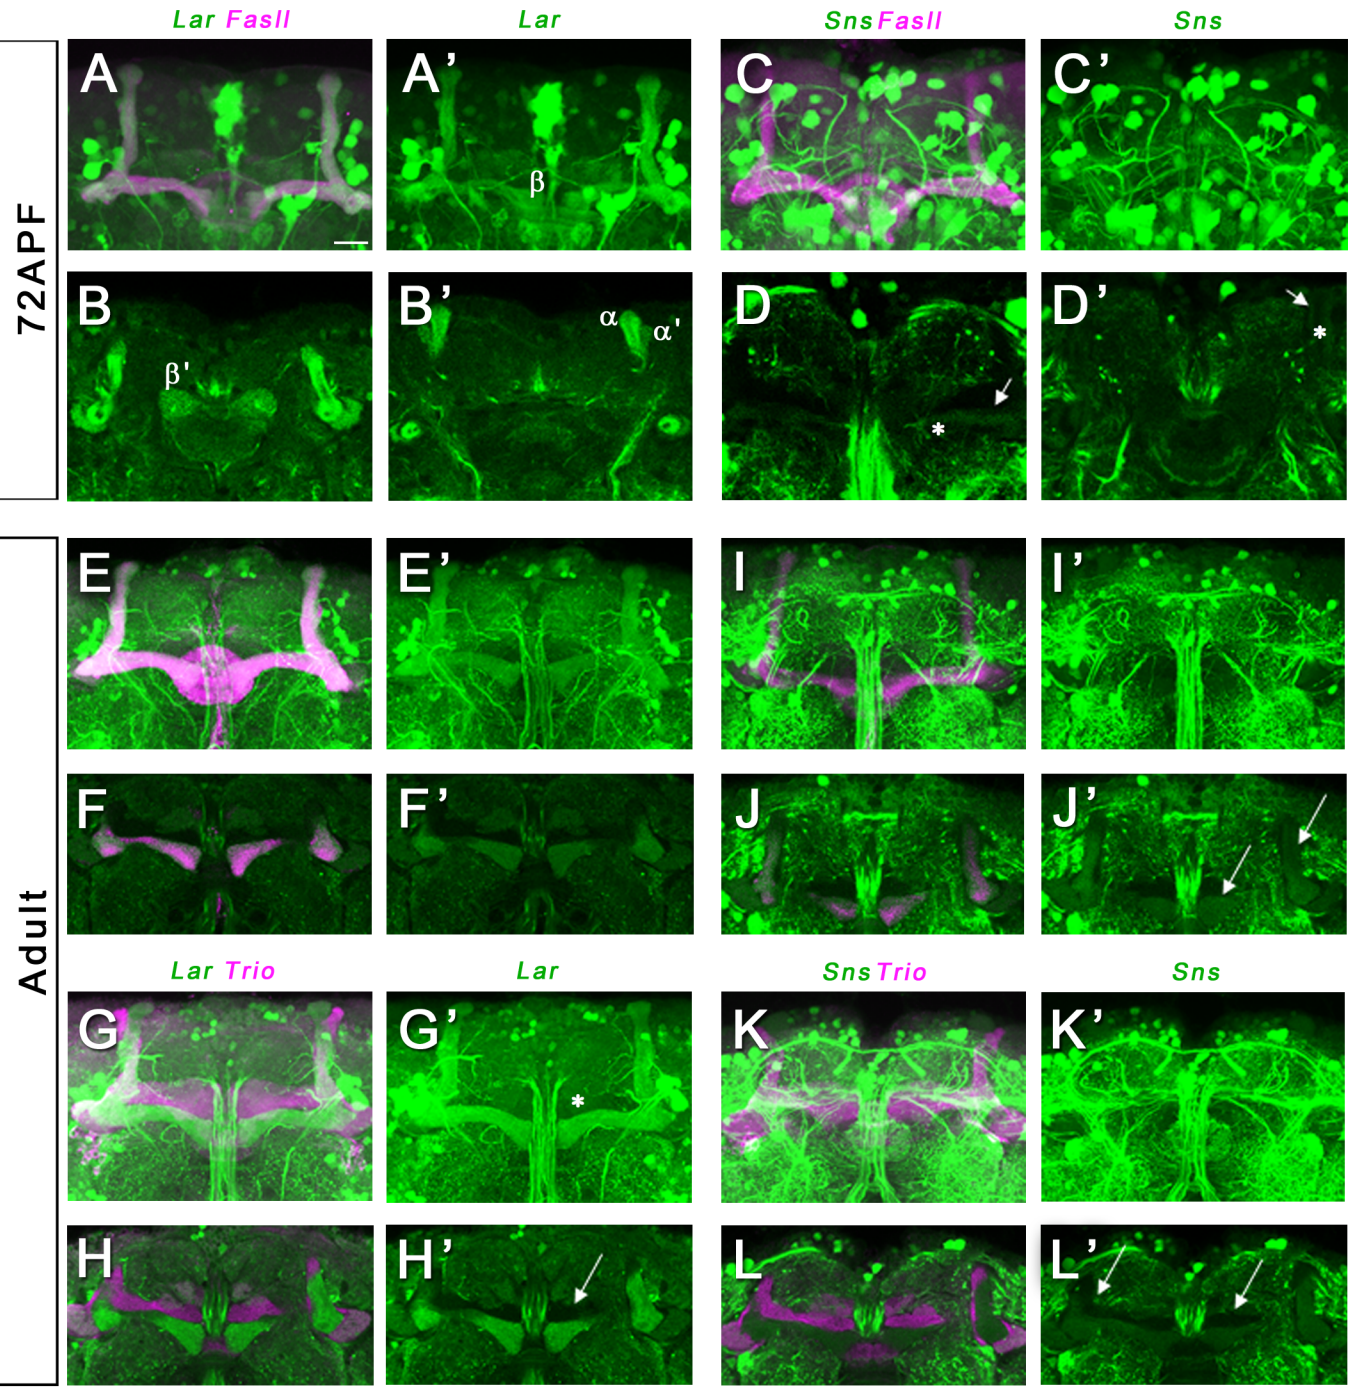

Supplement: supp [file elife-71469-supp-v1.zip]

Figure 6-figure supplement 1

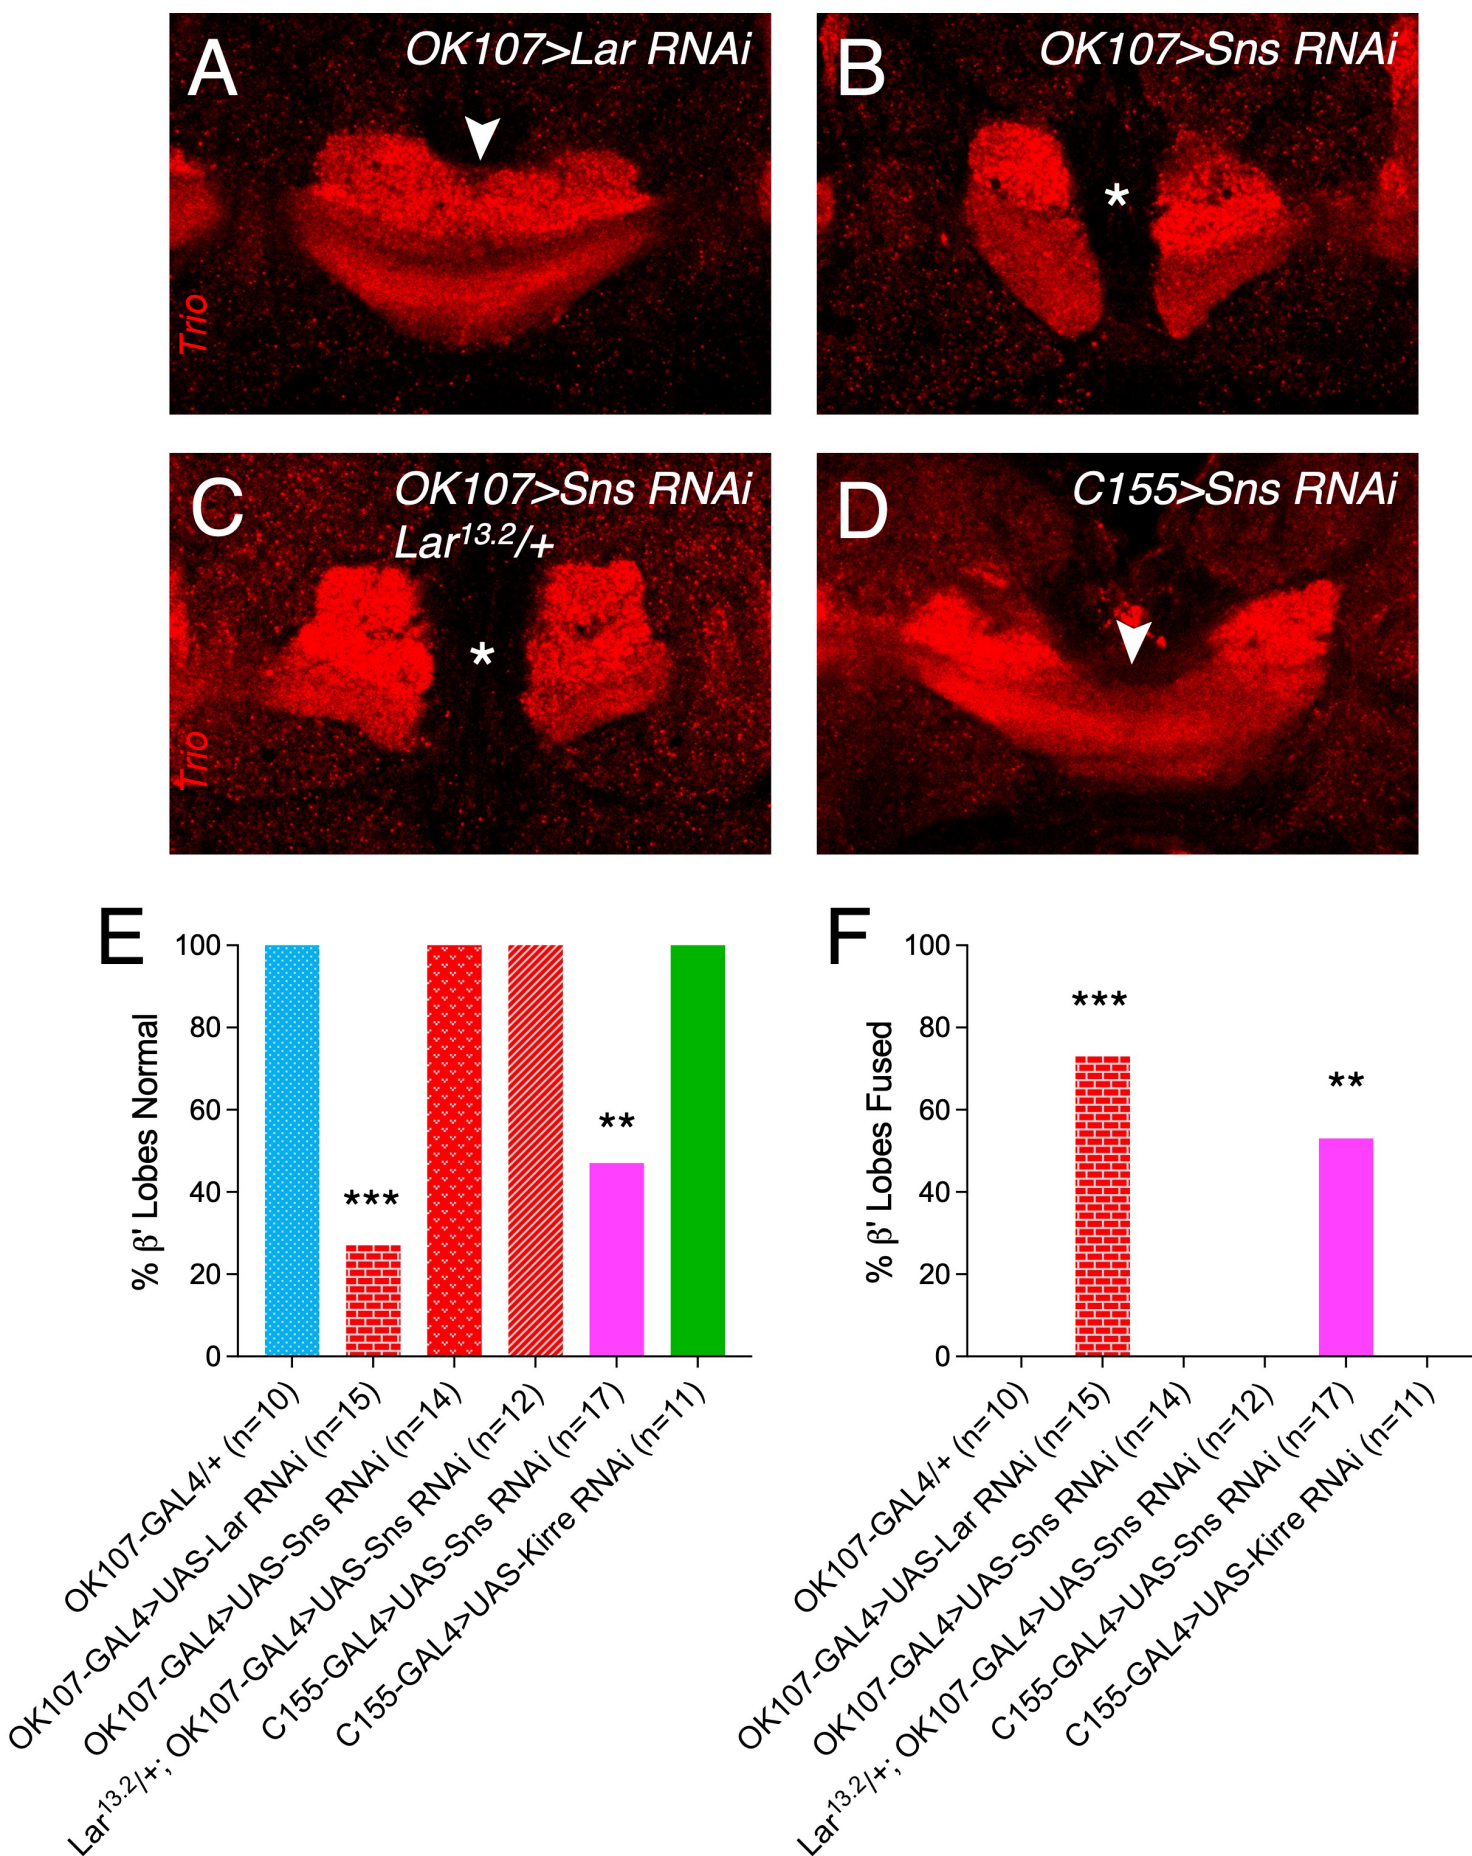

Supplement: supp [file elife-71469-supp-v1.zip]

Figure 8-figure supplement 1

*C155>Sns RNAi*

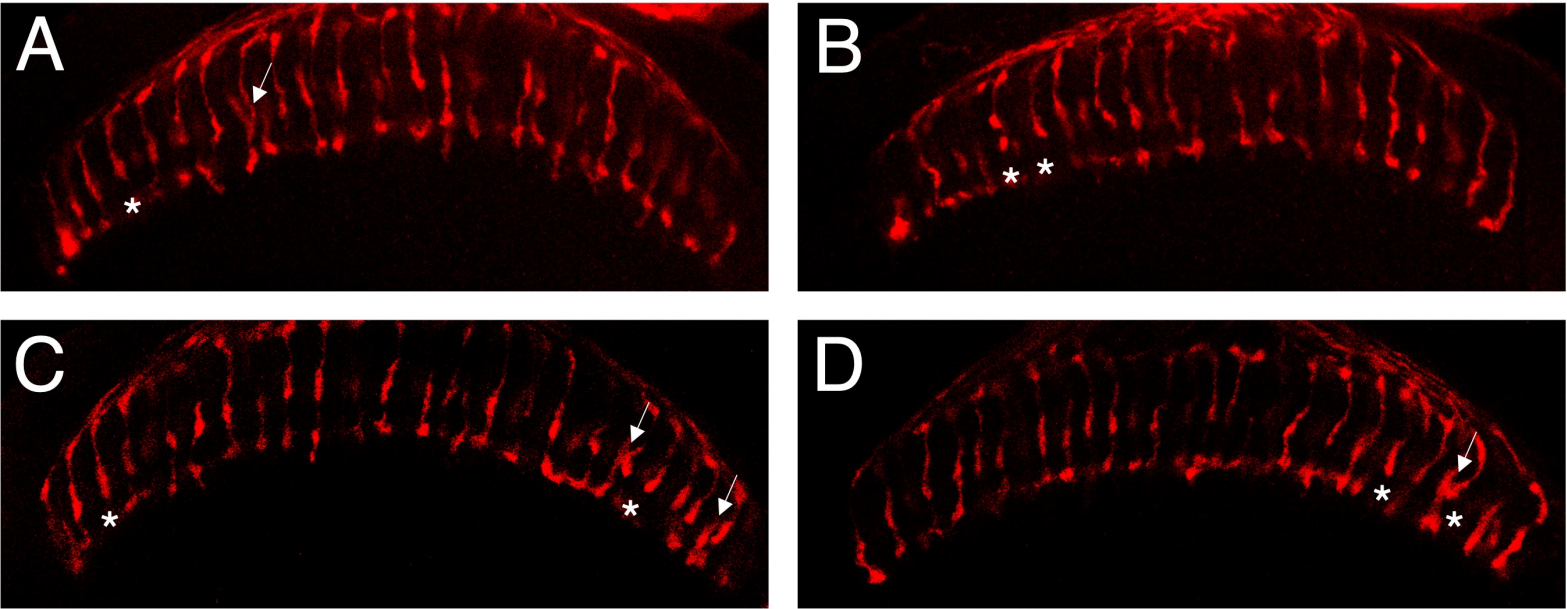

Supplement: supp [file elife-71469-supp-v1.zip]

Figure 2-figure supplement 1

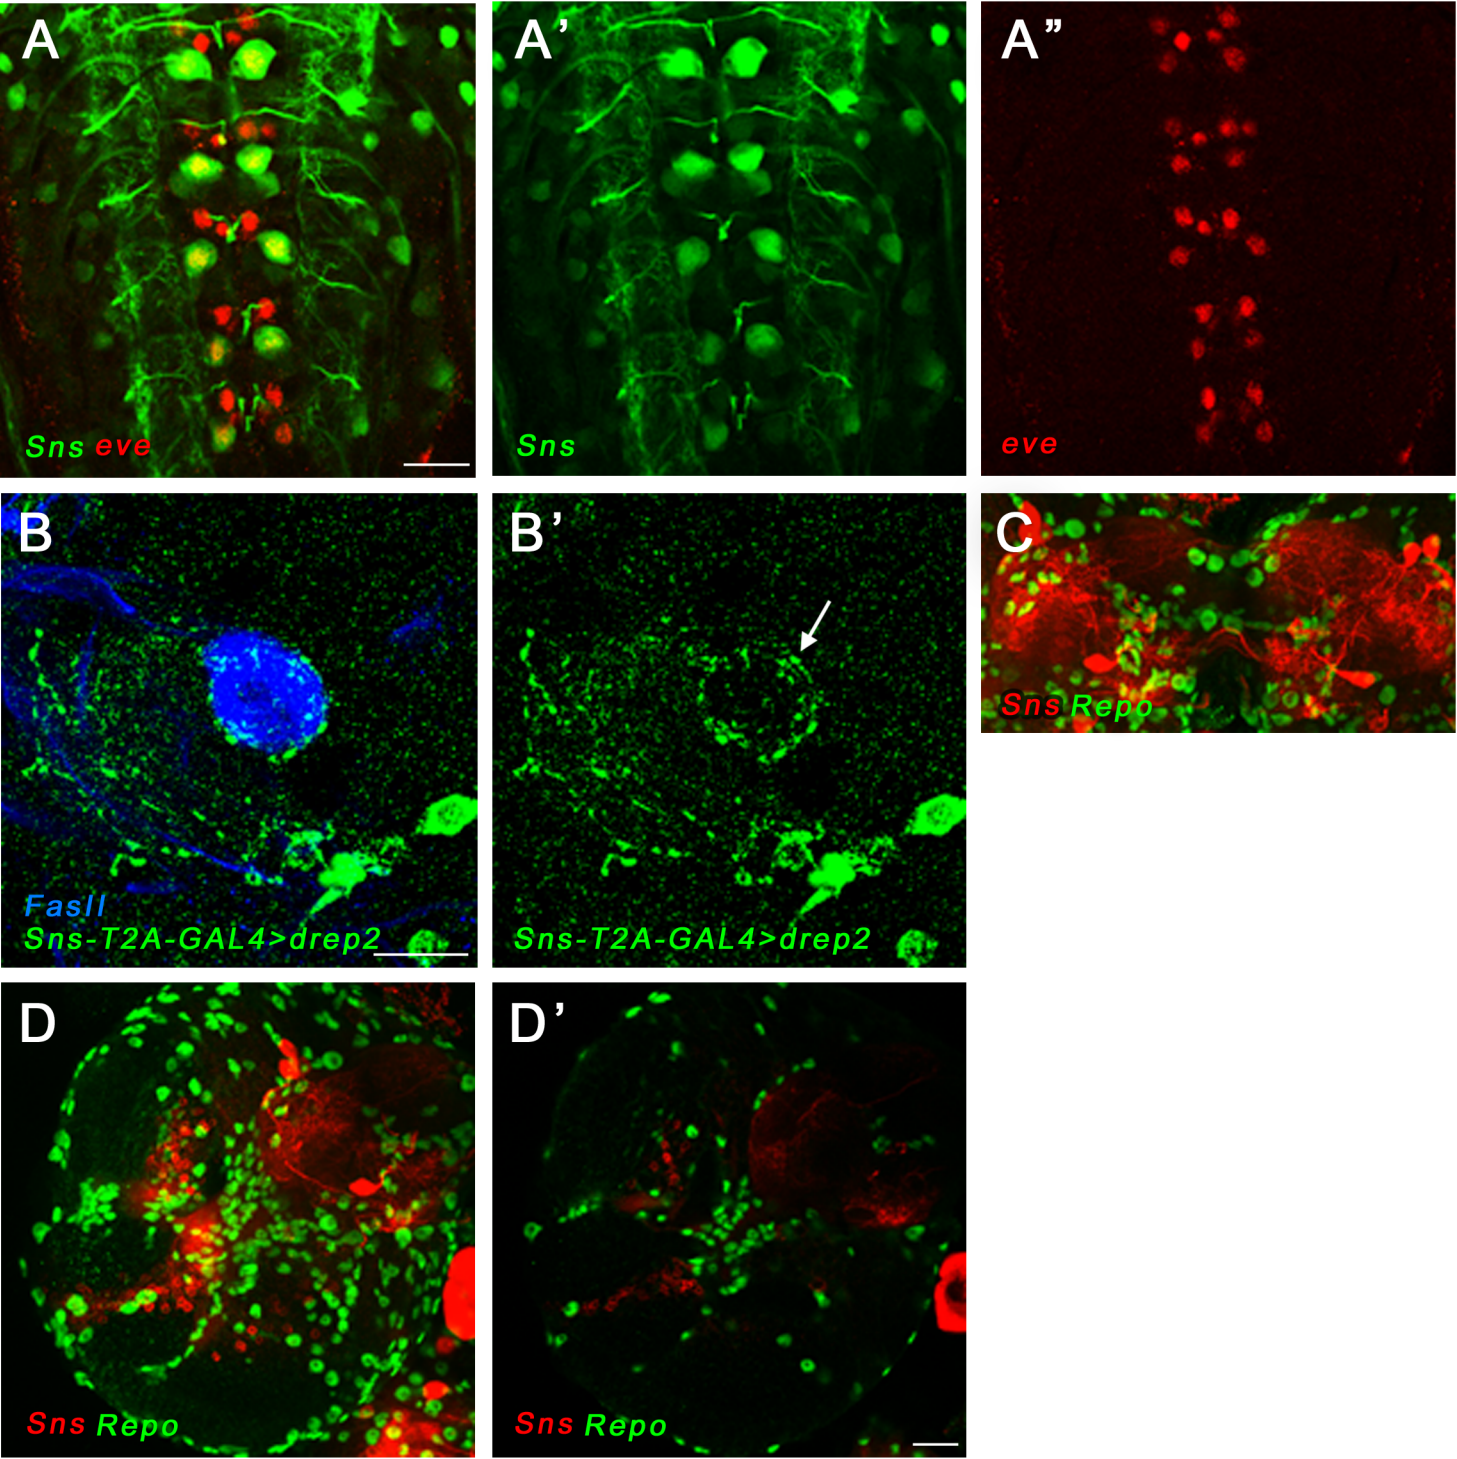

Supplement: supp [file elife-71469-supp-v1.zip]

Figure 4-figure supplement 2

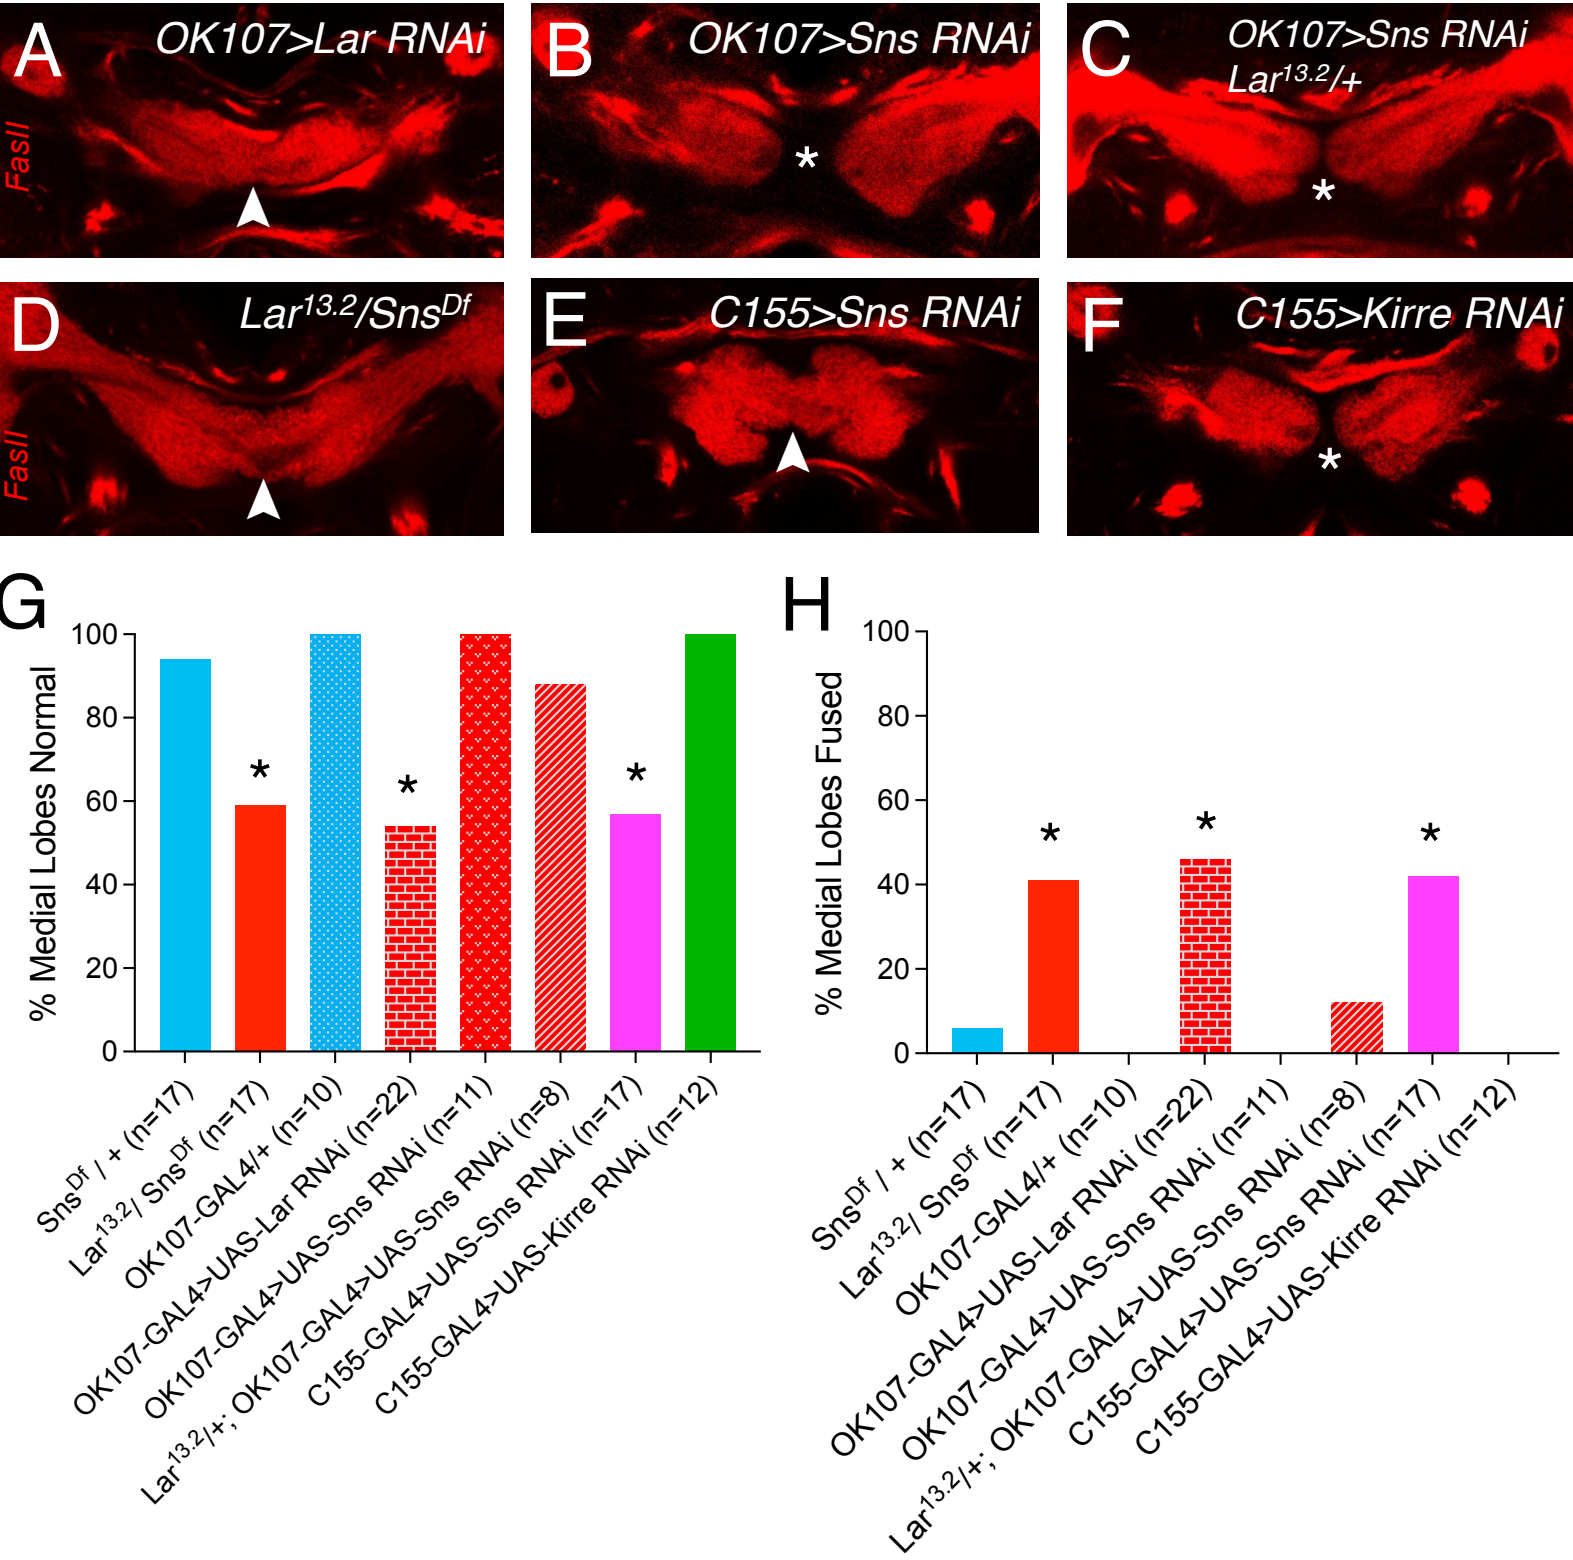

Supplement: supp [file elife-71469-supp-v1.zip]

Figure 4-figure supplement 1

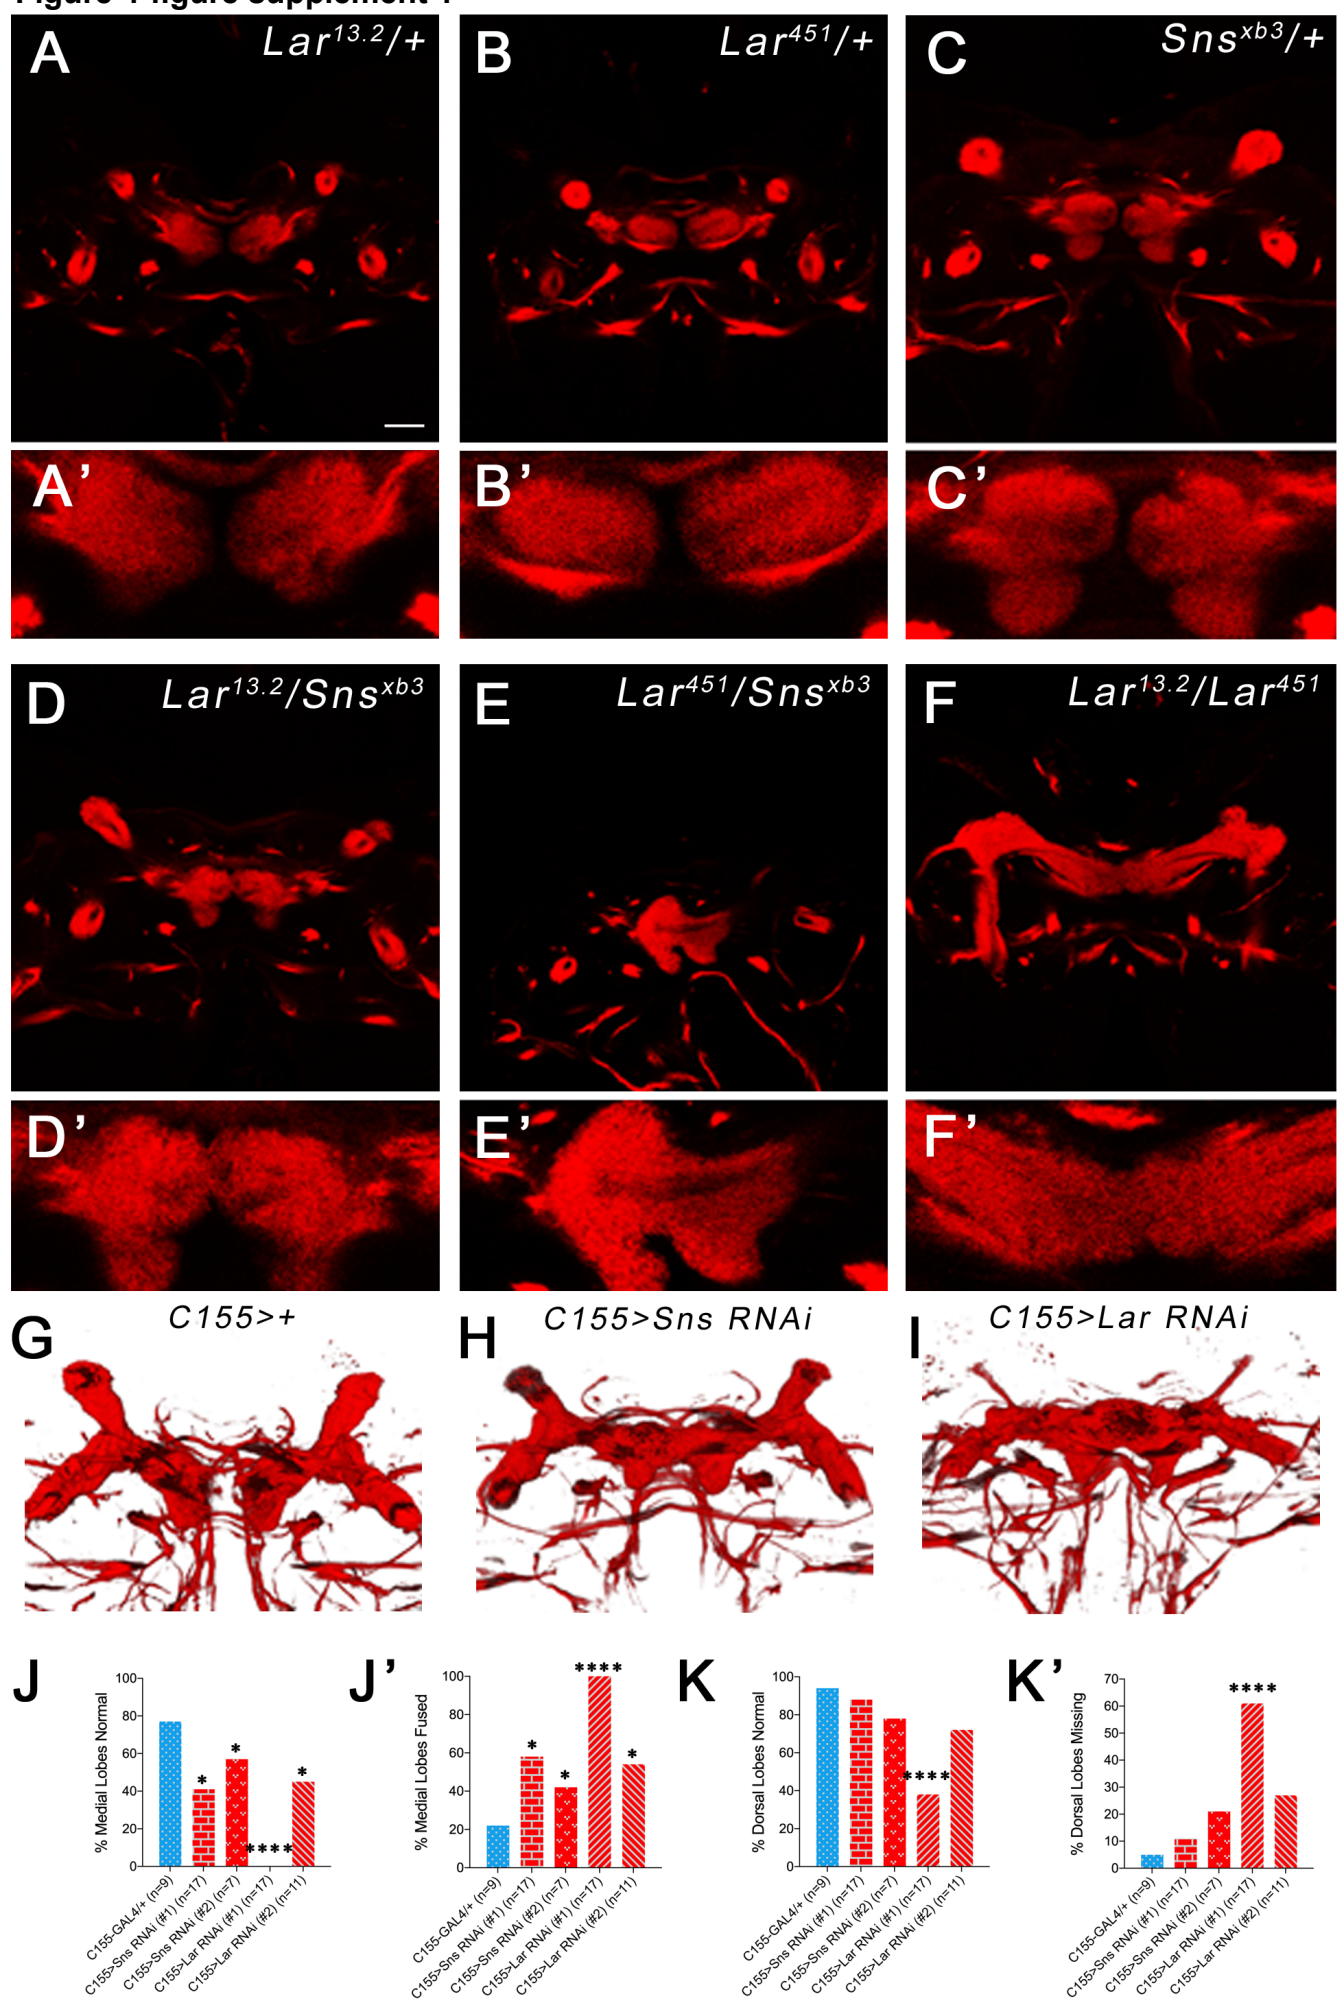

Supplement: supp [file elife-71469-supp-v1.zip]

**Figure 3-figure supplement 1**

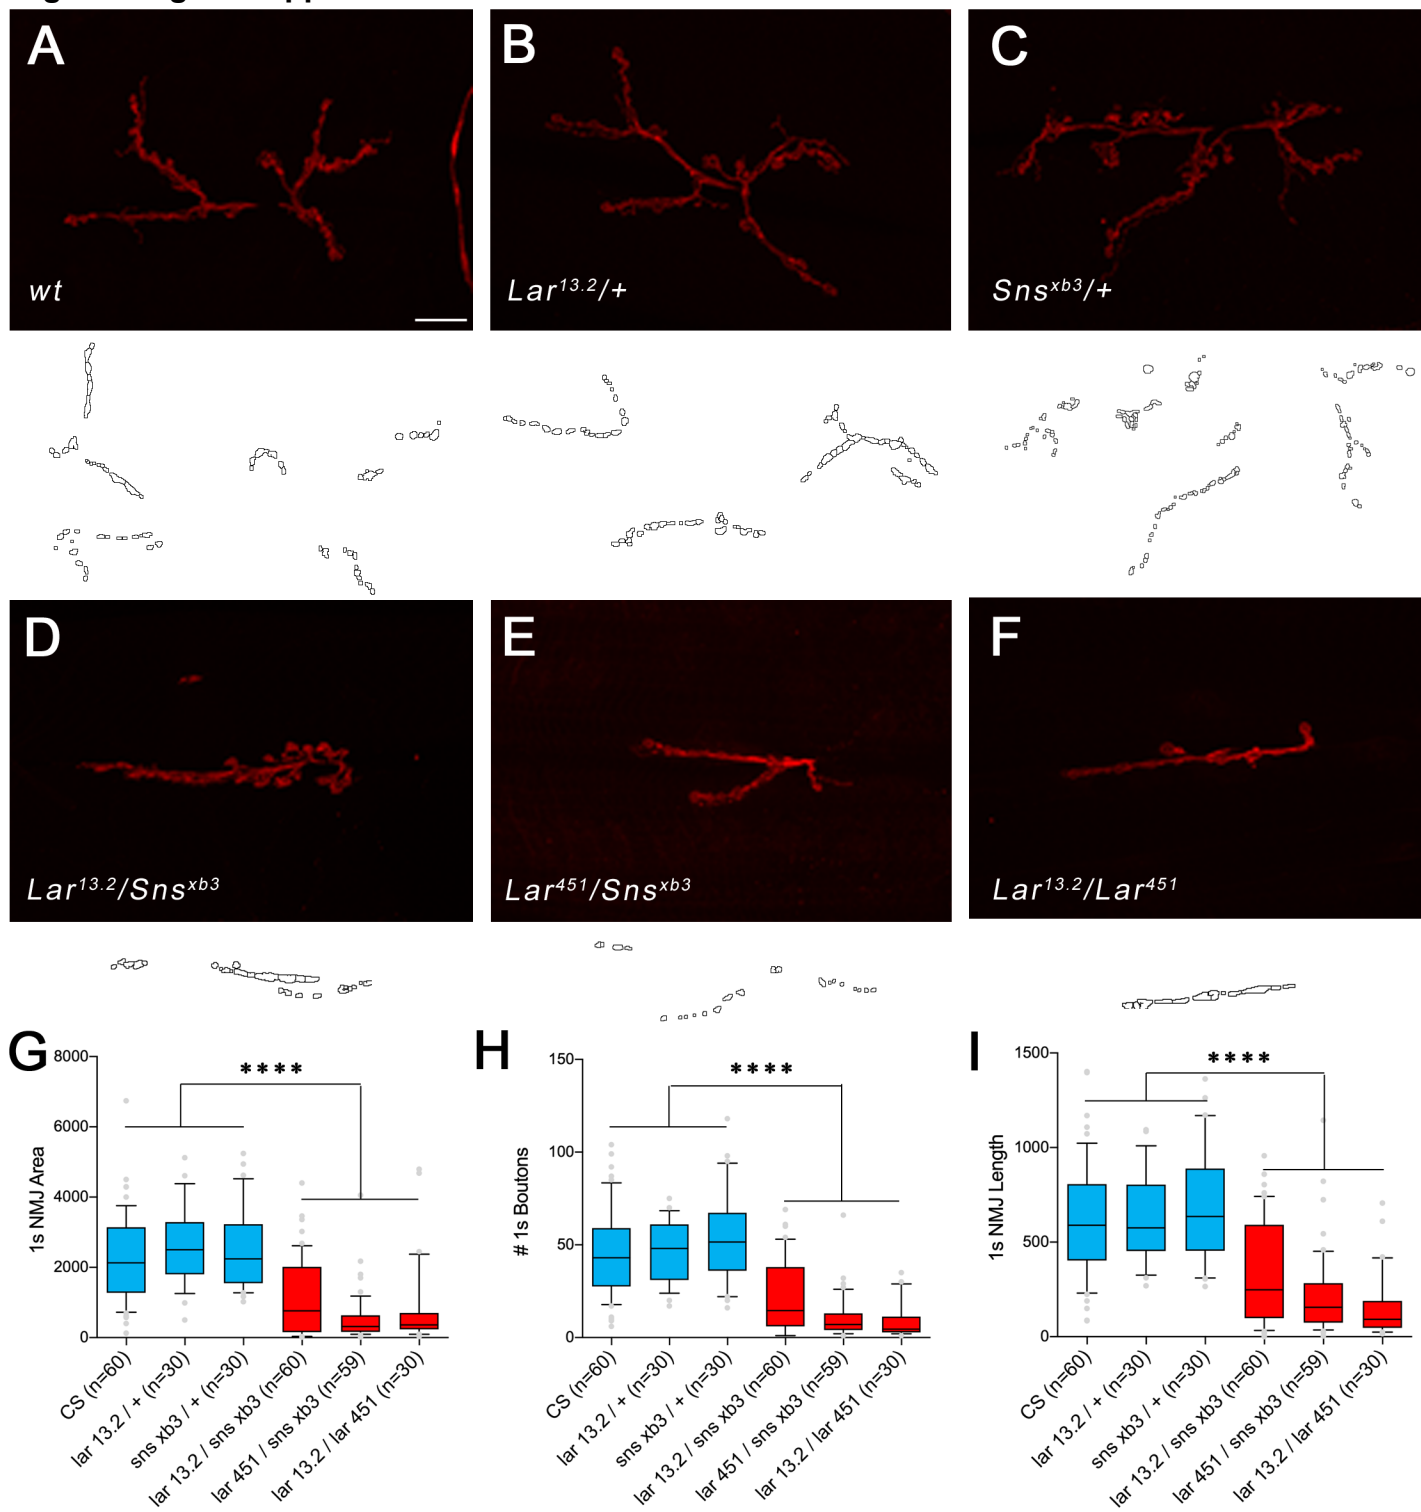

Supplement: supp [file elife-71469-supp-v1.zip]

Figure 7-figure supplement 2

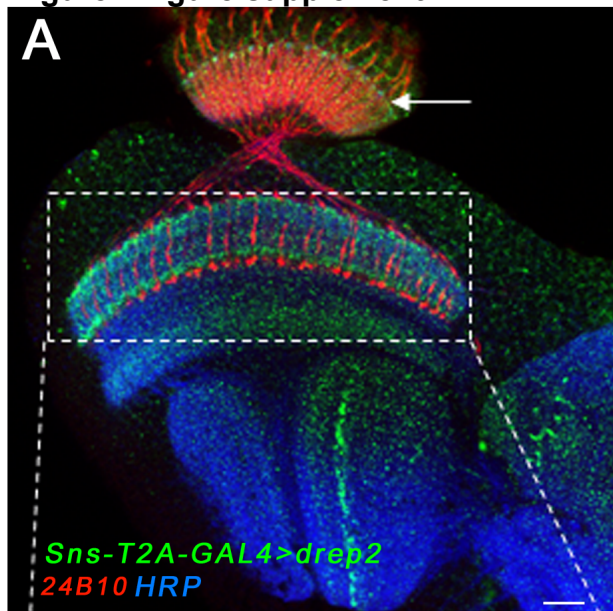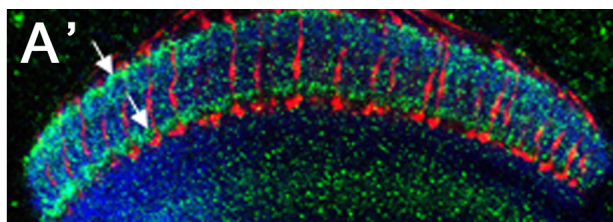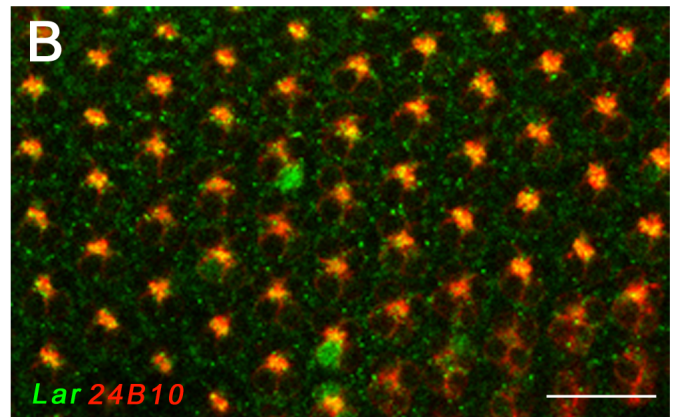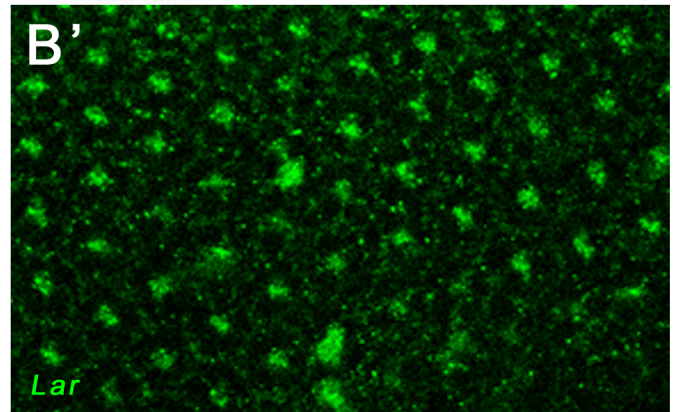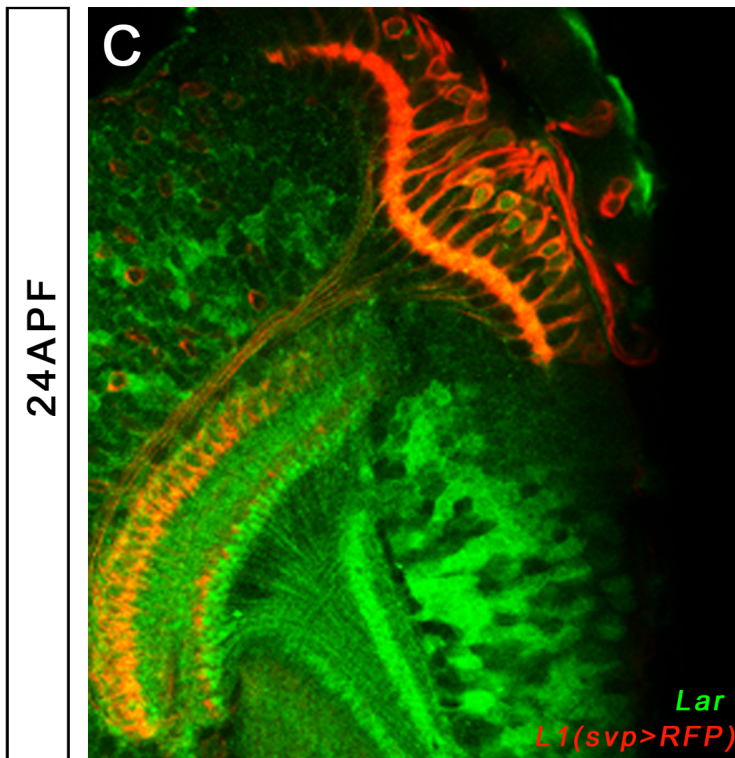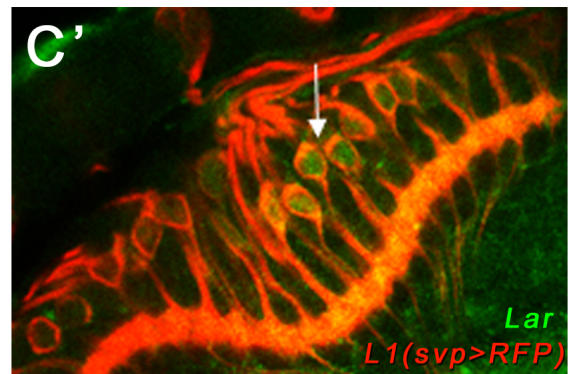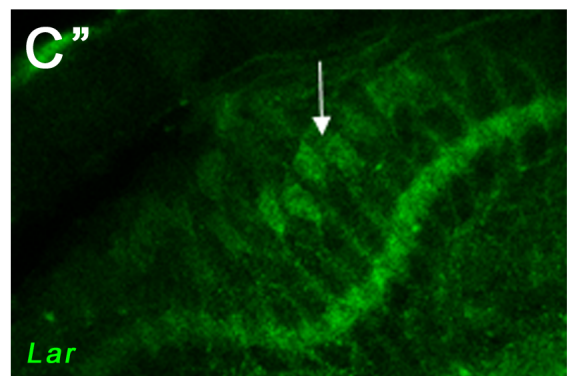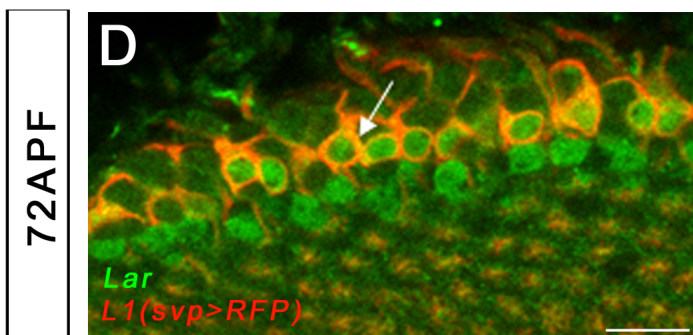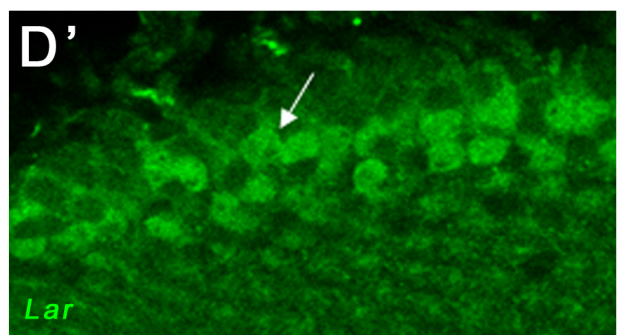

Supplement: supp [file elife-71469-supp-v1.zip]

Figure 5-figure supplement 2

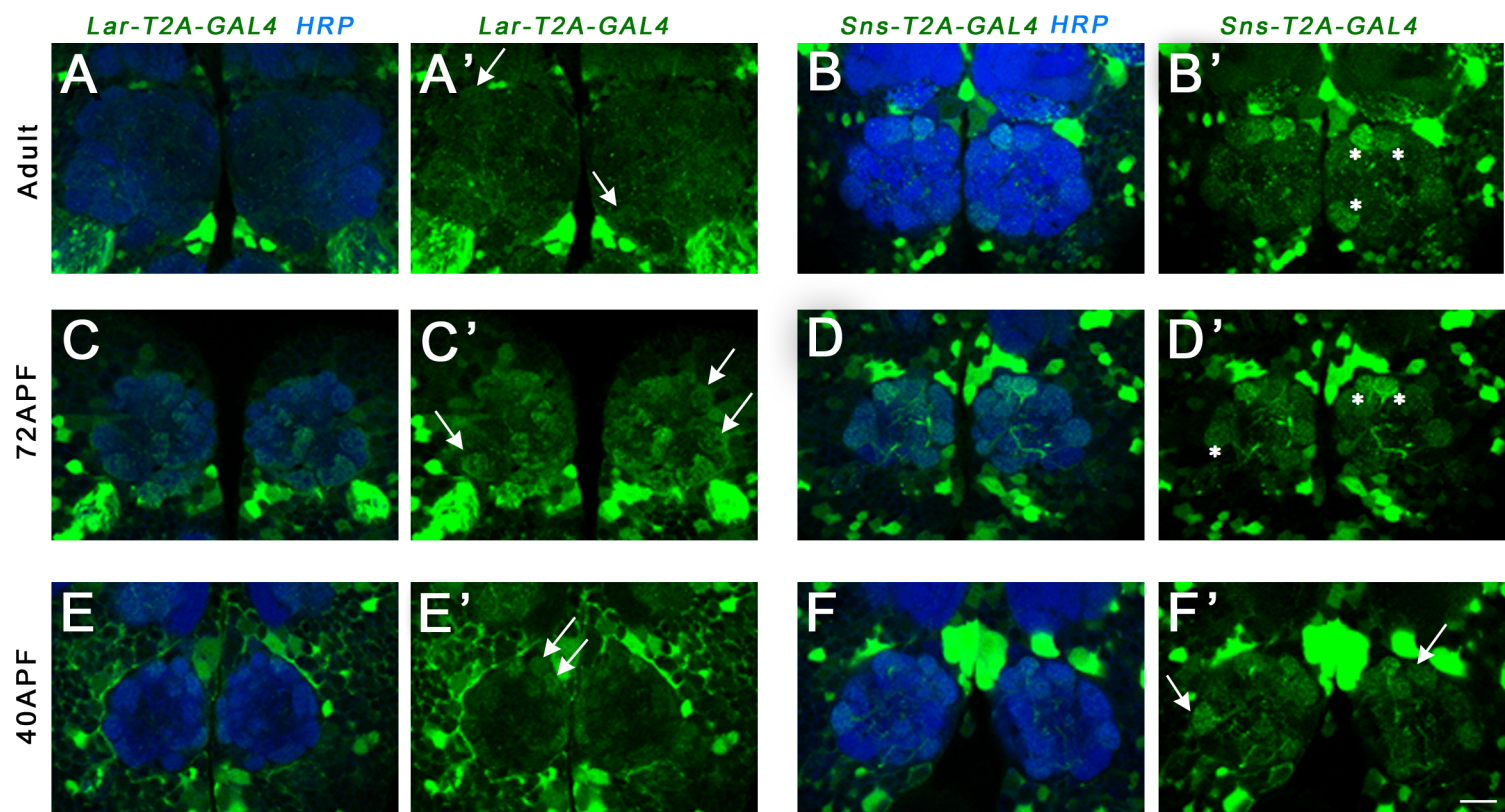

Supplement: supp [file elife-71469-supp-v1.zip]
